# Supplementary material
Source: Springer Nature journal article supplement (https://www.springermedizin.de/resource/supplementary/13012_2011_579_MOESM4_ESM.pdf/9630020)
Supplement: MOESM4 [file 9630020]

**Table 3: Content of instruments measuring CQI implementation and use** <sup>1,2,3,4</sup>

|                                                                  | Apekey, 2011a [84] | Engels, 2006 [150] | Geboers, 2001a [121] | Solberg, 1998a [56] | Solberg, 2008 (1) [151] | Alemi, 2001 [99] * | Alexander, 2007 [152] * | Barsness, 1993 [89] | Duckers, 2008 (1) [93] | Gilman, 1995 [153] * | Gustafson, 2003 (1) [42] | Heifrich, 2009 (1) [95] | Lemieux-Charles, 2002 [35] | Meurer, 2002 (1) [108] | Olsson, 2003a (1) [154] * | Øvretveit, 2004 (1) [96] * | Schouten, 2010 (1) [94] | Westphal, 1997 (1) [155] * | Wilkens, 2006 [156] |  |
|------------------------------------------------------------------|--------------------|--------------------|----------------------|---------------------|-------------------------|--------------------|-------------------------|---------------------|------------------------|----------------------|--------------------------|-------------------------|----------------------------|------------------------|---------------------------|----------------------------|-------------------------|----------------------------|---------------------|--|
|                                                                  | primary care       |                    |                      |                     |                         | other health care  |                         |                     |                        |                      |                          |                         |                            |                        |                           |                            |                         |                            |                     |  |
| <b>CQI implement process</b>                                     |                    |                    |                      |                     |                         |                    |                         |                     |                        |                      |                          |                         |                            |                        |                           |                            |                         |                            |                     |  |
| Training in CQI principles, methods, tools                       |                    |                    | X                    |                     |                         |                    |                         |                     |                        |                      |                          |                         |                            |                        |                           |                            |                         |                            |                     |  |
| content, satisfaction with                                       |                    |                    |                      |                     |                         |                    |                         |                     |                        |                      |                          |                         |                            |                        |                           |                            |                         | X                          |                     |  |
| coverage, timing, duration                                       |                    |                    |                      |                     |                         |                    |                         |                     |                        |                      |                          |                         |                            |                        |                           |                            |                         |                            |                     |  |
| <b>Facilitation of CQI process</b>                               |                    |                    |                      |                     |                         |                    |                         |                     |                        |                      |                          |                         |                            |                        |                           |                            |                         |                            |                     |  |
| capability and influence of facilitator                          |                    |                    |                      |                     |                         |                    |                         |                     | X                      |                      | X                        | X                       |                            |                        |                           | X                          | X                       |                            |                     |  |
| type of support provided and effectiveness                       |                    |                    |                      |                     |                         | X                  |                         | X                   |                        |                      | X                        |                         |                            |                        |                           |                            | X                       |                            | X                   |  |
| commitment of facilitator                                        |                    |                    | X                    |                     | X                       |                    |                         | X                   |                        | X                    | X                        |                         |                            |                        |                           |                            | X                       |                            |                     |  |
| <b>Influencing roles</b>                                         |                    |                    |                      |                     |                         |                    |                         |                     |                        |                      |                          |                         |                            |                        |                           |                            |                         |                            |                     |  |
| opinion leaders (support for CQI, QI or proposed change)         |                    |                    |                      |                     |                         |                    |                         |                     |                        |                      |                          | X                       |                            |                        |                           | X                          | X                       |                            |                     |  |
| champion                                                         |                    |                    |                      |                     | X                       |                    |                         |                     |                        |                      | X                        |                         |                            |                        |                           |                            |                         |                            |                     |  |
| <b>Organisation-wide use of CQI methods</b>                      |                    |                    |                      |                     |                         |                    |                         |                     |                        |                      |                          |                         |                            |                        |                           |                            |                         |                            |                     |  |
| Continuous process improvement                                   |                    |                    |                      |                     | X                       |                    |                         | X                   |                        |                      |                          |                         |                            |                        |                           |                            |                         |                            |                     |  |
| Structured problem solving, statistical methods and measurement  |                    |                    |                      |                     | X                       |                    |                         | X                   |                        |                      |                          |                         |                            |                        |                           |                            |                         |                            |                     |  |
| Teams as major mechanism for improvement                         |                    |                    |                      |                     | X                       |                    |                         | X                   |                        |                      |                          |                         |                            | X                      |                           |                            |                         |                            | X                   |  |
| Empowerment to identify and act on opportunities for improvement |                    |                    |                      |                     | X                       |                    |                         | X                   |                        |                      |                          |                         |                            | X                      |                           |                            |                         |                            |                     |  |
| Explicit focus on customers                                      |                    |                    |                      |                     | X                       |                    |                         | X                   |                        |                      |                          |                         |                            | X                      |                           |                            |                         |                            |                     |  |
| <b>Use of CQI methods by QI teams</b>                            |                    |                    |                      |                     |                         |                    |                         |                     |                        |                      |                          |                         |                            |                        |                           |                            |                         |                            |                     |  |
| QI team formation, roles, meetings                               |                    |                    | X                    | X                   | X                       |                    |                         |                     | X                      |                      |                          |                         | X                          |                        | X                         | X                          | X                       |                            |                     |  |
| Setting overall aims                                             |                    |                    | X                    | X                   | X                       |                    |                         |                     |                        |                      |                          |                         | X                          |                        | X                         | X                          | X                       |                            |                     |  |
| Structured problem solving                                       |                    |                    |                      |                     |                         |                    |                         |                     |                        |                      |                          |                         | X                          |                        |                           |                            |                         |                            |                     |  |
| mapping existing process                                         |                    |                    | X                    | X                   | X                       |                    |                         |                     |                        |                      |                          |                         |                            |                        |                           |                            |                         |                            |                     |  |
| setting specific goals for process improvement                   |                    | X                  | X                    | X                   | X                       |                    |                         |                     |                        |                      |                          |                         |                            |                        | X                         | X                          | X                       |                            |                     |  |
| selecting measures                                               |                    | X                  |                      | X                   |                         |                    |                         |                     |                        |                      |                          |                         | X                          |                        |                           | X                          | X                       |                            |                     |  |
| identifying sources of variation, root cause                     |                    | X                  |                      | X                   |                         |                    |                         |                     |                        |                      |                          |                         | X                          |                        |                           |                            |                         |                            |                     |  |
| identifying and prioritising changes                             |                    |                    | X                    | X                   | X                       |                    |                         |                     |                        |                      |                          |                         | X                          |                        |                           |                            | X                       |                            |                     |  |
| planning and testing changes on small scale                      |                    | X                  | X                    |                     | X                       |                    |                         |                     |                        |                      |                          |                         | X                          |                        |                           |                            | X                       |                            |                     |  |
| Implementation & spread of changes                               |                    |                    |                      | X                   | X                       |                    |                         |                     |                        |                      |                          |                         |                            |                        |                           |                            |                         |                            |                     |  |
| Data collection and analysis during QI process                   |                    |                    |                      |                     |                         |                    |                         |                     |                        |                      |                          |                         |                            |                        |                           |                            |                         |                            |                     |  |
| to characterise problem                                          |                    | X                  |                      | X                   | X                       |                    |                         |                     |                        |                      | X                        |                         | X                          |                        | X                         |                            | X                       |                            |                     |  |
| to identify sources & root cause of variation                    |                    |                    |                      |                     |                         |                    |                         |                     |                        |                      |                          |                         | X                          |                        |                           |                            |                         |                            |                     |  |
| to identify potential changes/solutions                          |                    |                    |                      | X                   |                         |                    |                         |                     |                        |                      | X                        |                         |                            |                        |                           |                            |                         | X                          |                     |  |
| to monitor the effect of changes                                 |                    | X                  |                      | X                   | X                       |                    |                         |                     |                        |                      | X                        |                         | X                          |                        |                           | X                          | X                       |                            |                     |  |
| Use of QI tools to collect, manage and analyse data              |                    |                    | X                    |                     |                         |                    |                         |                     |                        |                      |                          |                         |                            |                        |                           |                            |                         |                            |                     |  |
| tools used                                                       | X                  |                    |                      |                     | X                       |                    |                         |                     | X                      |                      |                          |                         |                            | X                      |                           |                            |                         |                            | X                   |  |
| extent/frequency of use                                          | X                  |                    |                      |                     |                         |                    | X                       |                     |                        |                      |                          |                         |                            |                        |                           |                            |                         |                            |                     |  |
| Use of QI tools to facilitate group process                      |                    |                    | X                    |                     |                         |                    |                         |                     |                        |                      |                          |                         |                            |                        |                           |                            |                         |                            |                     |  |
| tools used                                                       | X                  |                    |                      |                     |                         |                    |                         |                     | X                      |                      |                          |                         | X                          |                        |                           |                            |                         |                            | X                   |  |
| extent/frequency of use                                          | X                  |                    |                      |                     |                         |                    | X                       |                     |                        |                      |                          |                         |                            | X                      |                           |                            |                         |                            |                     |  |

<sup>1</sup> 'a' and 'b' are used to label instruments when multiple instruments are reported from a single paper (or two papers in the same year).

<sup>2</sup> (1) and (2) denote an instrument with content spanning more than one domain, (1) being the first entry and (2) the second entry.

<sup>3</sup> \* Denotes instruments excluded from Stage 4 - review of measurement properties (hence, they do not appear in Table 10 or in Additional files 5 and 6).

<sup>4</sup> An 'X' may represent a single item, multiple items or an entire scale





**Table 5: Content of instruments measuring organisational context in non healthcare settings** <sup>1,2,3,4,5</sup>

|                                                                      | Ahire, 1996 [42] * | Armenakis, 2007 (1) [43] | Bouckennooghe, 2009 [44] * | Dabhikar, 2007 [45] * | Fisher, 2005 [46] * | Jansen, 2004 [47] * | Holt, 2007 (1) [48] | Taveira, 2003a [49] * | Taveira, 2003b [49] * | Zeitz, 1997a [50] * | Zeitz, 1997b [50] * |
|----------------------------------------------------------------------|--------------------|--------------------------|----------------------------|-----------------------|---------------------|---------------------|---------------------|-----------------------|-----------------------|---------------------|---------------------|
|                                                                      | non health care    |                          |                            |                       |                     |                     |                     |                       |                       |                     |                     |
| <b>Capability</b>                                                    |                    |                          |                            |                       |                     |                     |                     |                       |                       |                     |                     |
| Collective efficacy, skills, competency for CQI, change, improvement |                    |                          |                            |                       |                     |                     |                     |                       |                       |                     |                     |
| Capability development                                               |                    |                          |                            |                       |                     |                     |                     |                       |                       |                     |                     |
| - history of using CQI methods or change                             | X                  |                          |                            |                       |                     |                     |                     |                       |                       |                     |                     |
| - training in CQI principles, methods, tools                         |                    |                          |                            |                       |                     |                     |                     | X                     |                       |                     |                     |
| - training & development (not QI specific)                           | X                  |                          |                            |                       | X                   |                     |                     |                       |                       |                     |                     |
| - capacity for learning, knowledge sharing                           |                    |                          |                            | X                     | X                   |                     |                     |                       |                       |                     | X                   |
| <b>Commitment, goals, motivation</b>                                 |                    |                          |                            |                       |                     |                     |                     |                       |                       |                     |                     |
| Attitudinal indicators                                               |                    |                          |                            |                       |                     |                     |                     |                       |                       |                     |                     |
| - beliefs about CQI                                                  |                    |                          |                            |                       | X                   |                     |                     |                       |                       |                     |                     |
| - beliefs about change, improvement, quality                         |                    |                          |                            |                       | X                   |                     |                     |                       | X                     | X                   | X                   |
| Behaviours indicating commitment                                     |                    |                          |                            |                       |                     |                     |                     |                       |                       |                     |                     |
| - to CQI                                                             |                    |                          |                            | X                     |                     |                     |                     |                       |                       |                     |                     |
| - to change, improvement or quality                                  |                    |                          |                            | X                     |                     |                     |                     |                       | X                     | X                   | X                   |
| Factors motivating use of CQI / change                               |                    |                          |                            |                       |                     |                     |                     |                       |                       |                     |                     |
| Tension for change                                                   |                    |                          |                            |                       |                     |                     |                     |                       |                       |                     |                     |
| <b>Climate for QI or change</b>                                      |                    |                          |                            |                       |                     |                     |                     |                       |                       |                     |                     |
| Emphasis on process improvement                                      |                    |                          |                            | X                     | X                   |                     |                     | X                     |                       | X                   |                     |
| Focus on customers' needs & expectations                             | X                  |                          |                            | X                     | X                   |                     |                     | X                     |                       | X                   |                     |
| Staff involvement & participation                                    | X                  |                          | X                          | X                     | X                   |                     |                     | X                     |                       | X                   | X                   |
| Staff empowerment for QI                                             | X                  |                          |                            |                       | X                   |                     |                     |                       |                       |                     | X                   |
| Support for risk taking, experimentation, new ideas                  |                    |                          |                            | X                     |                     |                     |                     |                       | X                     | X                   | X                   |
| Data & information for monitoring & improvement                      | X                  |                          |                            | X                     |                     |                     |                     | X                     |                       | X                   |                     |
| - timeliness, accuracy, relevance                                    |                    |                          |                            |                       |                     |                     |                     |                       |                       |                     |                     |
| - comparison with similar organisations                              | X                  |                          |                            |                       |                     |                     |                     | X                     |                       |                     |                     |
| Alignment of QI with organisational plans & goals                    |                    |                          |                            | X                     |                     |                     |                     |                       |                       |                     |                     |
| Integration of QI with daily work                                    |                    |                          |                            | X                     |                     |                     |                     |                       |                       |                     |                     |
| Recognition, rewards for QI or quality                               | X                  |                          |                            | X                     |                     |                     |                     | X                     | X                     | X                   | X                   |
| <b>Generic climate</b>                                               |                    |                          |                            |                       |                     |                     |                     |                       |                       |                     |                     |
| Cooperation, collaboration, coordination                             |                    |                          | X                          | X                     | X                   |                     |                     |                       | X                     | X                   |                     |
| Communication, openness                                              |                    |                          | X                          |                       | X                   |                     |                     |                       | X                     |                     | X                   |
| Cohesion; shared goals, beliefs, values                              |                    |                          | X                          |                       |                     |                     |                     |                       | X                     | X                   | X                   |
| Conflict                                                             |                    |                          |                            |                       | X                   |                     |                     |                       |                       |                     | X                   |
| Role stress, overload, busyness, role clarity                        |                    |                          |                            |                       |                     |                     |                     |                       | X                     |                     |                     |
| Job challenge, meaningfulness, autonomy                              |                    |                          |                            |                       |                     |                     |                     |                       | X                     |                     | X                   |
| Internal & external networks                                         |                    |                          |                            | X                     |                     |                     |                     |                       |                       |                     |                     |
| Leader behaviours that influence climate                             |                    |                          | X                          |                       |                     |                     |                     |                       | X                     |                     | X                   |
| <b>Culture</b>                                                       |                    |                          |                            |                       |                     |                     |                     |                       | X-E                   |                     | X-E                 |
| QI specific dimensions                                               |                    |                          |                            |                       |                     |                     |                     |                       |                       |                     | X                   |
| <b>Leadership for QI at all levels</b>                               |                    |                          |                            |                       |                     |                     |                     |                       |                       |                     |                     |
| Sets clear goals & plans for quality, QI, change                     | X                  |                          | X                          | X                     | X                   |                     |                     |                       | X                     | X                   |                     |
| Commitment to QI (attitudes, behaviours)                             | X                  |                          | X                          | X                     | X                   |                     |                     | X                     |                       | X                   |                     |
| Enables involvement/empowerment                                      |                    |                          | X                          |                       | X                   |                     |                     |                       |                       |                     | X                   |
| Seeks & responds to staff suggestions, feedback, views               | X                  |                          | X                          | X                     |                     |                     |                     | X                     | X                     | X                   | X                   |
| Capability for QI and change                                         |                    |                          | X                          |                       |                     |                     |                     |                       |                       | X                   | X                   |
| <b>Resources, supporting systems, structures for QI</b>              |                    |                          |                            |                       |                     |                     |                     |                       |                       |                     |                     |
| <b>Organisational readiness for change</b>                           | X-E                |                          |                            |                       |                     |                     |                     |                       |                       |                     |                     |
| Commitment to imminent change                                        |                    | X                        | X                          |                       |                     | X                   | X                   |                       |                       |                     |                     |
| Efficacy for behaviours arising from change                          |                    | X                        |                            |                       |                     |                     |                     |                       |                       |                     |                     |
| Processes used to facilitate change                                  |                    |                          | X                          |                       |                     |                     |                     |                       |                       |                     |                     |

<sup>1</sup> 'a' and 'b' are used to label instruments when multiple instruments are reported from a single paper (or two papers in the same year). <sup>2</sup> (1) and (2) denote an instrument with content spanning more than one domain, (1) being the first entry and (2) the second entry. <sup>3</sup> \* Denotes instruments excluded from Stage 4 - review of measurement properties (hence, they do not appear in Table 10 or in Additional files 5 and 6). <sup>4</sup> An 'X' may represent a single item, multiple items or an entire scale. <sup>5</sup> X-E denotes instruments labelled by developers as measures of 'readiness' or 'culture'.

**Table 6: Content of instruments measuring individual level factors** 1,2,3,4

|                                                                   | Calomeni, 1999 [51] | Geboers, 2001b (2) [4] | Lin, 2005 [52] | Solberg, 1998b [53] | Balding, 2005 [54] * | Cunningham, 2002 [55] | Fedor, 2006 [18] * | Francois, 2005 [56] * | Gould, 2002 [57] * | Herscovitch, 2002a [58] | Herscovitch, 2002b [58] | Hill, 2001 [59] * | Irvine, 1995 [60] | Irvine, 1999 [61] | Lehman, 2002 [26] * | Miller, 2000 [62] * | Ogrinc, 2004 [63] * | Oudejans, 2011 [32] * | Armenakis, 2007 (2) [43] | Campbell, 2006 [64] * | Coyle-Shapiro, 2003 [65] | Hanpachern, 1998 [66] | Holt, 2007 (2) [48] | Jansen, 2004 [47] * | Spreitzer, 1995 [67] * | Wanberg, 2000 [68] * |   |
|-------------------------------------------------------------------|---------------------|------------------------|----------------|---------------------|----------------------|-----------------------|--------------------|-----------------------|--------------------|-------------------------|-------------------------|-------------------|-------------------|-------------------|---------------------|---------------------|---------------------|-----------------------|--------------------------|-----------------------|--------------------------|-----------------------|---------------------|---------------------|------------------------|----------------------|---|
|                                                                   | primary care        |                        |                |                     | other health care    |                       |                    |                       |                    |                         |                         |                   |                   |                   |                     |                     | non health care     |                       |                          |                       |                          |                       |                     |                     |                        |                      |   |
| Capability & empowerment for QI & change                          |                     |                        |                |                     |                      |                       |                    |                       |                    |                         |                         |                   |                   |                   |                     |                     |                     |                       |                          |                       |                          |                       |                     |                     |                        |                      |   |
| Existing knowledge in CQI specific domains                        |                     |                        |                |                     |                      |                       |                    |                       |                    |                         |                         |                   |                   |                   |                     |                     |                     |                       |                          |                       |                          |                       |                     |                     |                        |                      |   |
| - knowledge tests                                                 |                     |                        |                |                     |                      |                       |                    |                       | X                  |                         |                         |                   |                   |                   |                     |                     |                     |                       |                          |                       |                          |                       |                     |                     |                        |                      |   |
| - perceived knowledge                                             |                     |                        |                | X                   |                      |                       |                    | X                     |                    |                         |                         |                   |                   |                   |                     |                     |                     |                       |                          |                       |                          |                       |                     |                     |                        |                      |   |
| - prior training & participation                                  |                     |                        |                | X                   |                      |                       |                    |                       |                    |                         |                         |                   |                   |                   |                     |                     |                     |                       |                          |                       |                          |                       |                     |                     |                        |                      |   |
| Efficacy, perceived competency, perceived skills                  |                     |                        |                |                     |                      |                       |                    |                       |                    |                         |                         |                   |                   |                   |                     |                     |                     |                       |                          |                       |                          |                       |                     |                     |                        |                      |   |
| - beliefs about capability to perform CQI activities              | X                   | X                      |                |                     |                      |                       |                    |                       | X                  |                         |                         |                   |                   | X                 |                     |                     | X                   |                       |                          |                       |                          |                       |                     |                     |                        |                      |   |
| - beliefs about capability to contribute to change or improvement | X                   |                        |                |                     |                      |                       |                    |                       | X                  |                         |                         |                   |                   | X                 |                     |                     | X                   | X                     |                          | X                     |                          |                       |                     |                     | X                      |                      |   |
| Empowerment, agency, self-determination, autonomy                 |                     |                        |                |                     | X                    |                       |                    |                       |                    |                         |                         |                   |                   | X                 |                     |                     |                     |                       |                          |                       |                          |                       |                     |                     | X                      |                      |   |
| - self determination or autonomy to initiate improvement          |                     |                        |                |                     |                      |                       |                    |                       |                    |                         |                         |                   |                   | X                 |                     |                     |                     |                       | X                        |                       |                          |                       |                     |                     | X                      |                      |   |
| - perceived ability to influence quality, QI outcomes, change     |                     |                        |                |                     | X                    |                       |                    |                       |                    |                         |                         |                   |                   | X                 | X                   |                     |                     | X                     |                          |                       |                          |                       |                     |                     | X                      |                      |   |
| Commitment, goals, motivation                                     |                     |                        | X              |                     |                      |                       |                    |                       |                    |                         |                         |                   |                   |                   |                     |                     |                     |                       |                          |                       |                          |                       |                     |                     |                        |                      |   |
| Attitudinal measures                                              |                     |                        |                |                     |                      |                       |                    |                       |                    |                         |                         |                   |                   |                   |                     |                     |                     |                       |                          |                       |                          |                       |                     |                     |                        |                      |   |
| - beliefs about need for change, improvement (discrepancy)        |                     |                        |                | X                   |                      | X                     | X                  |                       | X                  | X                       |                         | X                 |                   |                   |                     |                     |                     |                       |                          | X                     | X                        |                       | X                   | X                   |                        | X                    | X |
| - agreement with the principles & methods of CQI                  |                     | X                      |                | X                   | X                    |                       |                    |                       | X                  |                         |                         | X                 |                   |                   |                     |                     |                     |                       |                          |                       |                          |                       |                     |                     |                        |                      |   |
| - beliefs about consequences & outcomes of CQI, QI or change      | X                   | X                      | X              | X                   | X                    |                       |                    | X                     | X                  |                         |                         | X                 |                   |                   |                     | X                   |                     |                       |                          | X                     | X                        |                       |                     |                     |                        |                      |   |
| - value placed on expected outcomes of QI, change                 | X                   |                        | X              |                     |                      |                       |                    |                       |                    | X                       |                         |                   |                   |                   |                     |                     |                     |                       |                          | X                     |                          |                       | X                   | X                   |                        | X                    | X |
| - perceived responsibility for & pride in quality, QI             | X                   |                        |                |                     | X                    |                       |                    | X                     |                    |                         |                         |                   |                   |                   |                     | X                   |                     | X                     |                          |                       | X                        |                       |                     |                     |                        |                      |   |
| - specific factors that motivate participation                    | X                   | X                      |                |                     |                      |                       |                    | X                     |                    | X                       |                         | X                 |                   |                   |                     |                     |                     |                       |                          |                       |                          |                       |                     |                     |                        |                      |   |
| Behaviours & intentions indicating commitment                     |                     |                        |                |                     |                      |                       |                    |                       |                    |                         |                         |                   |                   |                   |                     |                     |                     |                       |                          |                       |                          |                       |                     |                     |                        |                      |   |
| - intention to participate in future CQI activities               |                     |                        |                | X                   |                      |                       |                    |                       |                    |                         |                         |                   |                   |                   |                     |                     |                     |                       |                          |                       |                          |                       |                     |                     |                        |                      |   |
| - intention to participate in or support change, improvement      |                     |                        |                |                     |                      | X                     | X                  | X                     |                    |                         | X                       |                   |                   |                   |                     |                     |                     |                       |                          |                       |                          |                       | X                   |                     |                        |                      |   |
| - adopting behaviours consistent with CQI                         |                     |                        |                |                     |                      |                       |                    |                       |                    |                         |                         |                   |                   | X                 |                     |                     | X                   |                       |                          |                       |                          |                       |                     |                     |                        |                      |   |
| - adopting behaviours that support change, improvement            |                     | X                      |                |                     |                      | X                     | X                  |                       |                    |                         | X                       |                   | X                 |                   | X                   |                     |                     | X                     |                          | X                     | X                        |                       |                     |                     |                        |                      |   |
| Individual readiness for change                                   |                     |                        |                |                     |                      | X-E                   |                    |                       |                    |                         |                         |                   |                   |                   |                     |                     |                     |                       | X-E                      |                       | X-E                      | X-E                   |                     |                     |                        |                      |   |
| Commitment to specific, imminent change                           |                     |                        |                |                     |                      |                       | X                  |                       |                    | X                       | X                       |                   |                   |                   |                     |                     |                     |                       |                          |                       | X                        | X                     | X                   |                     |                        | X                    | X |
| - attitudes indicating commitment                                 |                     |                        |                |                     |                      |                       |                    |                       |                    | X                       |                         |                   |                   |                   |                     |                     |                     |                       | X                        |                       |                          |                       | X                   | X                   |                        |                      | X |
| - behaviours or intentions indicating support for change          |                     |                        |                |                     |                      |                       | X                  |                       |                    |                         | X                       |                   |                   |                   |                     |                     |                     |                       |                          |                       |                          | X                     |                     |                     |                        |                      |   |
| Efficacy for change implementation process & behaviours arising   |                     |                        |                |                     |                      |                       |                    |                       |                    |                         |                         |                   |                   |                   |                     |                     |                     |                       | X                        |                       |                          |                       | X                   |                     |                        |                      |   |

<sup>1</sup> 'a' and 'b' are used to label instruments when multiple instruments are reported from a single paper (or two papers in the same year).

<sup>2</sup> (1) and (2) denote an instrument with content spanning more than one domain, (1) being the first entry and (2) the second entry.

<sup>3</sup> \* Denotes instruments excluded from Stage 4 - review of measurement properties (hence, they do not appear in Table 10 or in Additional files 5 and 6).

<sup>4</sup> An 'X' may represent a single item, multiple items or an entire scale. X-E denotes instruments labelled by developers as measures of 'readiness'



## References

1. Apekey TA, McSorley G, Tilling M, Siriwardena AN: **Room for improvement? Leadership, innovation culture and uptake of quality improvement methods in general practice.** *J Eval Clin Pract* 2011, **17**:311-318.
2. Bobiak SN, Zyzanski SJ, Ruhe MC, Carter CA, Ragan B, Flocke SA, Litaker D, Stange KC: **Measuring practice capacity for change: a tool for guiding quality improvement in primary care settings.** *Qual Manag Health Care* 2009, **18**:278-284.
3. Book S, Hellstrom A, Olsson J: **Perceptions of improvement work in Swedish health care: implications for improvement practices.** *Qual Manag Health Care* 2003, **12**:217-224.
4. Geboers H, Mokkink H, van Montfort P, van den Hoogen H, van den Bosch W, Grol R: **Continuous quality improvement in small general medical practices: the attitudes of general practitioners and other practice staff.** *Int J Qual Health Care* 2001, **13**:391-397.
5. Kralewski J, Dowd BE, Kaissi A, Curoe A, Rockwood T: **Measuring the culture of medical group practices.** *Health Care Manage Rev* 2005, **30**:184-193.
6. Leykum L, Palmer R, Lanham H, Jordan M, McDaniel R, Noel P, Parchman M: **Reciprocal learning and chronic care model implementation in primary care: results from a new scale of learning in primary care settings.** *BMC Health Serv Res* 2011, **11**:44.
7. Marsden PV, Landon BE, Wilson IB, McInnes K, Hirschhorn LR, Ding L, Cleary PD: **The reliability of survey assessments of characteristics of medical clinics.** *Health Serv Res* 2006, **41**:265-283.
8. Ohman-Strickland PA, John Orzano A, Nutting PA, Perry Dickinson W, Scott-Cawiezell J, Hahn K, Gibel M, Crabtree BF: **Measuring organizational attributes of primary care practices: development of a new instrument.** *Health Serv Res* 2007, **42**:1257-1273.
9. Olsson J, Kammerlind P, Thor J, Elg M: **Surveying improvement activities in health care on a national level--the Swedish internal collaborative strategy and its challenges.** *Qual Manag Health Care* 2003, **12**:202-216.
10. Parker VA, Wubbenhorst WH, Young GJ, Desai KR, Charms MP: **Implementing quality improvement in hospitals: the role of leadership and culture.** *Am J Med Qual* 1999, **14**:64-69.
11. Rushmer RK, Kelly D, Lough M, Wilkinson JE, Greig GJ, Davies HT: **The Learning Practice Inventory: diagnosing and developing Learning Practices in the UK.** *J Eval Clin Pract* 2007, **13**:206-211.
12. Solberg LI, Asche SE, Margolis KL, Whitebird RR: **Measuring an organization's ability to manage change: the change process capability questionnaire and its use for improving depression care.** *Am J Med Qual* 2008, **23**:193-200.
13. Shortell SM, Rousseau DM, Gillies RR, Devers KJ, Simons TL: **Organizational assessment in intensive care units (ICUs): construct development, reliability, and validity of the ICU nurse-physician questionnaire.** *Med Care* 1991, **29**:709-726.
14. Stevenson K, Baker R: **Investigating organisational culture in primary care.** *Qual Prim Care* 2005, **13**:191-200.
15. Sylvester S: **Measuring the learning practice: diagnosing the culture in general practice.** *Qual Prim Care* 2003, **11**:29-40.
16. Duckers MLA, Wagner C, Groenewegen PP: **Developing and testing an instrument to measure the presence of conditions for successful implementation of quality improvement collaboratives.** *BMC Health Serv Res* 2008, **8**:172.
17. Estabrooks C, Squires J, Cummings G, Birdsell J, Norton P: **Development and assessment of the Alberta Context Tool.** *BMC Health Serv Res* 2009, **9**:234.
18. Fedor DB, Fedor DB, Caldwell S, Herold DM: **The effects of organizational changes on employee commitment: a multilevel investigation.** *Pers Psychol* 2006, **59**:1-29.
19. Freeman T: **Measuring progress in clinical governance: assessing the reliability and validity of the Clinical Governance Climate Questionnaire.** *Health Serv Manage Res* 2003, **16**:234-250.

20. Gustafson DH, Sainfort F, Eichler M, Adams L, Bisognano M, Steudel H: **Developing and testing a model to predict outcomes of organizational change.** *Health Serv Res* 2003, **38**:751-776.
21. Helfrich CD, Li YF, Sharp ND, Sales AE: **Organizational readiness to change assessment (ORCA): Development of an instrument based on the Promoting Action on Research in Health Services (PARiHS) framework.** *Implement Sci* 2009, **4**:38.
22. Ingersoll GL, Kirsch JC, Merk SE, Lightfoot J: **Relationship of organizational culture and readiness for change to employee commitment to the organization.** *J Nurs Adm* 2000, **30**:11-20.
23. Kivimaki M, Maki E, Lindstrom K, Alanko A, Seitsonen S, Jarvinen K: **Does the implementation of Total Quality Management (TQM) change the wellbeing and work-related attitudes of health care personnel? Study of a TQM prize-winning surgical clinic.** *J Organ Change Manag* 1997, **10**:456-470.
24. Lageson C: **Brief report: reliability and validity of the TQManager feedback instrument.** *J Healthc Qual* 2006, **28**:45-49.
25. Lameei A: **Assessment of organization readiness for TQM implementation.** *Iran J Public Health* 2005, **34**:58-63.
26. Lehman WE, Greener JM, Simpson DD: **Assessing organizational readiness for change.** *J Subst Abuse Treat* 2002, **22**:197-209.
27. Levesque DA, Prochaska JM, Prochaska JO, Dewart SR, Hamby LS, Weeks WB: **Organizational stages and processes of change for continuous quality improvement in health care.** *Consulting Psychol J* 2001, **53**:139-153.
28. Marchionni C, Ritchie J: **Organizational factors that support the implementation of a nursing best practice guideline.** *J Nurs Manag* 2008, **16**:266-274.
29. Meurer SJ, Rubio DM, Counte MA, Burroughs T: **Development of a healthcare quality improvement measurement tool: results of a content validity study.** *Hosp Top* 2002, **80**:7-13.
30. Nelson EC, Batalden PB, Huber TP, Mohr JJ, Godfrey MM, Headrick LA, Wasson JH: **Microsystems in health care: Part 1. Learning from high-performing front-line clinical units.** *Jt Comm J Qual Improv* 2002, **28**:472-493.
31. Olsson JA, Ovretveit J, Kammerlind P: **Developing and testing a model to predict outcomes of organizational change.** *Qual Manag Health Care* 2003, **12**:240-249.
32. Oudejans SC, Schippers GM, Schramade MH, Koeter MW, van den Brink W: **Measuring the learning capacity of organisations: development and factor analysis of the Questionnaire for Learning Organizations.** *Qual Saf Health Care* 2011.
33. Øvretveit J: **Change achievement success indicators (CASI)** [<http://www.qualityhealthcare.org>]
34. Rondeau KV, Wagar TH: **Organizational learning and continuous quality improvement: examining the impact on nursing home performance.** *Healthc Manage Forum* 2002, **15**:17-23.
35. Rondeau KV, Wagar TH: **Implementing CQI while reducing the work force: how does it influence hospital performance?** *Healthc Manage Forum* 2004, **17**:22-29.
36. Schouten L, Grol R, Hulscher M: **Factors influencing success in quality improvement collaboratives: development and psychometric testing of an instrument.** *Implement Sci* 2010, **5**:84.
37. Shortell SM, Jones RH, Rademaker AW, Gillies RR, Dranove DS, Hughes EF, Budetti PP, Reynolds KS, Huang CF: **Assessing the impact of total quality management and organizational culture on multiple outcomes of care for coronary artery bypass graft surgery patients.** *Med Care* 2000, **38**:207-217.
38. Siloaho M, Hukkanen K, Kinnunen J: **Key elements of the implementation of a quality system in three Finnish clinical laboratories.** *Clin Chem Lab Med* 2001, **39**:988-996.
39. West TD: **Comparing change readiness, quality improvement, and cost management among Veterans Administration, for-profit, and nonprofit hospitals.** *J Health Care Finance* 1998, **25**:46-58.



40. Westphal JD, Gulati R, Shortell SM: **Customization or conformity? An institutional and network perspective on the content and consequences of TQM adoption.** *Adm Sci Q* 1997, **42**:366-394.
41. Zammuto RF, Krakower JY: **Quantitative and qualitative studies of organizational culture.** In *Research in organizational change and development. Volume 5.* Edited by Pasmore WA, Woodman RW: Emerald Group Publishing Limited; 1991: 83-114
42. Ahire SL, Golhar DY, Waller MA: **Development and validation of TQM implementation constructs.** *Decision Sci* 1996, **27**:23-55.
43. Armenakis AA, Bernerth JB, Pitts JP, Walker HJ: **Organizational change recipients' beliefs scale: development of an assessment instrument.** *J Appl Behav Sci* 2007, **43**:481-505.
44. Bouckennooghe D, Devos G, van den Broeck H: **Organizational Change Questionnaire-Climate of Change, Processes, and Readiness: development of a new instrument.** *J Psychol* 2009, **143**:559-599.
45. Dabhilkar M, Bengtsson L, Bessant J: **Convergence or national specificity? Testing the CI maturity model across multiple countries.** *Creat Innov Man* 2007, **16**:348-362.
46. Fisher CM, Barfield J, Li J, Mehta R: **Retesting a model of the Deming management method.** *Total Qual Manag Bus* 2005, **16**:401-412.
47. Jansen KJ: **From persistence to pursuit: A longitudinal examination of momentum during the early stages of strategic change.** *Organ Sci* 2004, **15**:276-294.
48. Holt DT, Armenakis AA, Field HS, Harris SG: **Readiness for organizational change.** *J Appl Behav Sci* 2007, **43**:232-255.
49. Taveira AD, James CA, Karsh BT, Sainfort F: **Quality management and the work environment: an empirical investigation in a public sector organization.** *Appl Ergon* 2003, **34**:281-291.
50. Zeitz G, Johannesson R, Ritchie JE, Jr.: **An employee survey measuring total quality management practices and culture: development and culture.** *Group Organ Manage* 1997, **22**:414-431.
51. Calomeni CA, Solberg LI, Conn SA: **Nurses on quality improvement teams: how do they benefit?** *J Nurs Care Qual* 1999, **13**:75-90.
52. Lin MK, Marsteller JA, Shortell SM, Mendel P, Pearson M, Rosen M, Wu SY: **Motivation to change chronic illness care: results from a national evaluation of quality improvement collaboratives.** *Health Care Manage Rev* 2005, **30**:139-156.
53. Solberg LI, Brekke ML, Kottke TE, Steel RP: **Continuous quality improvement in primary care: what's happening?** *Med Care* 1998, **36**:625-635.
54. Balding C: **Embedding organisational quality improvement through middle manager ownership.** *Int J Health Care Qual Assur Inc Leadersh Health Serv* 2005, **18**:271-288.
55. Cunningham CE, Woodward CA, Shannon HS, MacIntosh J, Lendrum B, Rosenbloom D, Brown J: **Readiness for organizational change: A longitudinal study of workplace, psychological and behavioural correlates.** *J Occup Organ Psychol* 2002, **75**:377-392.
56. Francois P, Vinck D, Labarere J, Reverdy T, Peyrin JC: **Assessment of an intervention to train teaching hospital care providers in quality management.** *Qual Saf Health Care* 2005, **14**:234-239.
57. Gould BE, Grey MR, Huntington CG, Gruman C, Rosen JH, Storey E, Abrahamson L, Conaty AM, Curry L, Ferreira M, et al: **Improving patient care outcomes by teaching quality improvement to medical students in community-based practices.** *Acad Med* 2002, **77**:1011-1018.
58. Herscovitch L, Meyer JP: **Commitment to organizational change: extension of a three-component model.** *J Appl Psychol* 2002, **87**:474-487.
59. Hill A, Gwadry-Sridhar F, Armstrong T, Sibbald WJ: **Development of the continuous quality improvement questionnaire (CQIQ).** *J Crit Care* 2001, **16**:150-160.
60. Irvine D: **The development of measures of organizational citizenship behaviour and changes in job behaviours related to quality management in health care.** *Health Serv Manage Res* 1995, **8**:143-161.

61. Irvine D, Leatt P, Evans MG, Baker RG: **Measurement of staff empowerment within health service organizations.** *J Nurs Meas* 1999, **7**:79-96.
62. Miller DK, Coe RM: **Physician participation in TQM in geriatric medicine.** *Jt Comm J Qual Improv* 2000, **26**:466-475.
63. Ogrinc G, Headrick LA, Morrison LJ, Foster T: **Teaching and assessing resident competence in practice-based learning and improvement.** *J Gen Intern Med* 2004, **19**:496-500.
64. Campbell D: **Embracing change: Examination of a 'capabilities and benevolence' beliefs model in a sample of military cadets.** *Mil Psychol* 2006, **18**:131-148.
65. Coyle-Shapiro JAM, Morrow PC: **The role of individual differences in employee adoption of TQM orientation.** *J Vocat Behav* 2003, **62**:320-340.
66. Hanpachern C, Morgan GA, Griego OV: **An extension of the theory of margin: a framework for assessing readiness for change.** *Hum Resour Dev Q* 1998, **9**:339-350.
67. Spreitzer GM: **Psychological empowerment in the workplace: dimensions, measurement and validation.** *Acad Manage J* 1995, **38**:1442-1465.
68. Wanberg CR, Banas JT: **Predictors and outcomes of openness to changes in a reorganizing workplace.** *J Appl Psychol* 2000, **85**:132-142.
69. Engels Y, van den Hombergh P, Mookink H, van den Hoogen H, van den Bosch W, Grol R: **The effects of a team-based continuous quality improvement intervention on the management of primary care: a randomised controlled trial.** *Br J Gen Pract* 2006, **56**:781-787.
70. Barsness ZI, Shortell SM, Gillies EFX, Hughes JL, O'Brien D: **The quality march. National survey profiles quality improvement activities.** *Hosp Health Netw* 1993, **67**:52-55.
71. Lemieux-Charles L, Murray M, Baker G, Barnsley J, Tasa K, Ibrahim S: **The effects of quality improvement practices on team effectiveness: a mediational model.** *J Organ Behav* 2002, **23**:533-553.
72. Wilkens R, London M: **Relationships between climate, process, and performance in continuous quality improvement groups.** *J Vocat Behav* 2006, **69**:510-523.
